# Supplementary material for: Chemoenzymatic synthesis of trans-dihydrodiol derivatives of monosubstituted benzenes from the corresponding cis-dihydrodiol isomers
Source: Royal Society of Chemistry journal article supplement (doi:10.1039/b616100f), 2007-01-01
Supplement: b616100f.pdf [file b616100f.pdf]

## Supplementary material

### *cis*-(1*S*,2*S*)-**3b** and *cis*-(1*R*,2*R*)-1,2-Dihydroxy-3-bromocyclohex-3-ene-**3b'**.

Enantiomer **3b**, white crystalline solid (0.82 g, 85%); mp 105-107 °C (CH<sub>2</sub>Cl<sub>2</sub>); [ $\alpha$ ]<sub>D</sub> -114 (*c* 1.15, MeOH); (Found: C, 37.3; H, 4.6. C<sub>6</sub>H<sub>9</sub>O<sub>2</sub>Br requires C 37.3; H, 4.7%);  $\delta_{\text{H}}$  (500 MHz, CDCl<sub>3</sub>) 1.80 (2 H, m, 6-H, 6'-H), 2.09 (1 H, m, 5-H), 2.24 (1 H, m, 5'-H), 3.95 (1 H, m, 1-H), 4.21 (1 H, d,  $J_{2,1}$  3.9, 2-H), 6.23 (1 H, dd,  $J_{4,5'} = J_{4,5} = 4.1$ , 4-H); *m/z* (EI) 194 (M<sup>+</sup>, 3%), 192 (M<sup>+</sup>, 3), 150 (98), 148 (100), 113 (17), 95 (10), 69 (18). Enantiomer **3b'**: [ $\alpha$ ]<sub>D</sub> +106 (*c* 1.33, MeOH).

### *cis*-(1*S*,2*S*)-**3c** and *cis*-(1*R*,2*R*)-1,2-Dihydroxy-3-iodocyclohex-3-ene-**3c'**.

Enantiomer **3c**, white crystalline solid (0.60 g, 50%); mp 109-111 °C (CHCl<sub>3</sub>/hexane); [ $\alpha$ ]<sub>D</sub> -84 (*c* 1.14, MeOH); (Found: C, 29.9; H, 3.6. C<sub>6</sub>H<sub>9</sub>O<sub>2</sub>I requires C 30.0; H, 3.8%);  $\delta_{\text{H}}$  (500 MHz, CDCl<sub>3</sub>) 1.84 (2 H, m, 6-H, 6'-H), 2.09 (1 H, m, 5-H), 2.28 (1 H, m, 5'-H), 3.96 (1 H, m, 1-H), 4.20 (1 H, d,  $J_{2,1}$  4.0, 2-H), 6.51 (1 H, dd,  $J_{4,5} = J_{4,5'} = 4.0$ , 4-H); *m/z* (EI) 240 (M<sup>+</sup>, 21%), 222 (9), 196 (100), 127 (7), 113 (38), 95 (15), 69 (47). Enantiomer **3c'**: [ $\alpha$ ]<sub>D</sub> +79 (*c* 1.20, MeOH).

### *cis*-(1*S*,2*R*)-1,2-Dihydroxy-3-(trifluoromethyl)cyclohex-3-ene **3d**.

Enantiomer **3d**, white crystalline solid (0.82 g, 90%); mp 105-107 °C (CHCl<sub>3</sub>/hexane); [ $\alpha$ ]<sub>D</sub> -129 (*c* 0.24, MeOH); (Found: M<sup>+</sup>, 182.0550. C<sub>7</sub>H<sub>9</sub>O<sub>2</sub>F<sub>3</sub> requires 182.0555);  $\delta_{\text{H}}$  (500 MHz, CDCl<sub>3</sub>) 1.71-1.79 (2 H, m, 6-H, 6'-H), 2.18 (1 H, m, 5-H), 2.33 (1 H, m, 5'-H), 3.71 (1 H, m,  $J_{1,2}$  3.5, 1-H), 4.27 (1 H, dd,  $J_{2,1}$  3.5, 2-H), 6.48 (1 H, m,  $J_{4,2}$  1.5, 4-H); *m/z* (EI) 182 (M<sup>+</sup>, 8%), 164 (25), 90 (100).

### *trans*-(1*S*,2*R*)-**5b** and *trans*-(1*R*,2*S*)-1,2-Dihydroxy-3-bromocyclohex-3-ene-**5b'**.

Enantiomer **5b**, white crystals (0.70 g, 66%); mp 89-91 °C (CHCl<sub>3</sub> / hexane), [ $\alpha$ ]<sub>D</sub> +76 (*c* 1.09, MeOH); (Found: C, 37.5; H, 4.5. C<sub>6</sub>H<sub>9</sub>O<sub>2</sub>Br requires C 37.3; H, 4.7%);  $\delta_{\text{H}}$  (500 MHz, CDCl<sub>3</sub>) 1.76 (1 H, m, 6-H), 1.97 (1 H, m, 6'-H), 2.19 (2 H, m, 5-H, 5'-H), 3.86 (1 H, m, 1-H), 4.08 (1 H, d,  $J_{2,1}$  6.4, 2-H), 6.16 (1 H, dd,  $J_{4,5} = J_{4,5'} = 3.7$ , 4-H); *m/z* (EI) 194 (M<sup>+</sup>, 2%), 192 (2), 176 (1), 174 (1), 150 (98), 148 (100), 113 (10), 95 (9), 69 (20). Enantiomer **5b'**: [ $\alpha$ ]<sub>D</sub> -74 (*c* 1.05, MeOH).

***trans*-(1*S*,2*R*)-5c and *trans*-(1*R*,2*S*)-1,2-Dihydroxy-3-iodocyclohex-3-ene-5c'.**

Enantiomer **5c**, white crystals (0.77 g, 58%); mp 111-112 °C (CHCl<sub>3</sub> / hexane); [ $\alpha$ ]<sub>D</sub> +46 (*c* 1.43, MeOH); (Found: C, 29.9; H, 3.7. C<sub>6</sub>H<sub>9</sub>O<sub>2</sub>I requires C 30.0; H, 3.8%);  $\delta$ <sub>H</sub> (500 MHz, CDCl<sub>3</sub>) 1.78 (1 H, m, 6-H), 2.00 (1 H, m, 6'-H), 2.19 (2 H, m, 5-H, 5'-H), 3.85 (1 H, m, 1-H), 4.03 (1 H, d, *J*<sub>2,1</sub> 6.6, 2-H), 6.43 (1 H, dd, *J*<sub>4,5</sub> = *J*<sub>4,5'</sub> 3.9, 4-H); *m/z* (EI) 240 (M<sup>+</sup>, 24%), 196 (100), 127 (8), 113 (20), 95 (10), 69 (37), 65 (27), 41 (50). Enantiomer **5c'**: [ $\alpha$ ]<sub>D</sub> -49 (*c* 1.5, MeOH).

***trans*-(1*S*,2*S*)-1,2-Dihydroxy-3-(trifluoromethyl)cyclohex-3-ene 5d.**

Enantiomer **5d**, light yellow oil (0.67 g, 67%); [ $\alpha$ ]<sub>D</sub> +120 (*c* 0.4, CHCl<sub>3</sub>); (Found: M<sup>+</sup>, 182.0546 C<sub>7</sub>H<sub>9</sub>F<sub>3</sub>O<sub>2</sub> requires 182.0555);  $\delta$ <sub>H</sub> (500 MHz, CDCl<sub>3</sub>) 1.74 (1 H, m, 6-H), 1.96 (1 H, m, 6'-H), 2.30 (2 H, m, 5-H, 5'-H), 3.88 (1 H, m, 1-H), 4.24 (1 H, d, *J*<sub>2,1</sub> 6.6, 2-H), 6.55 (1 H, dd, *J*<sub>4,5</sub> = *J*<sub>4,5'</sub> 3.0, 4-H); *m/z* (EI) 182 (M<sup>+</sup>, 8%), 164 (25), 90 (100).

***trans*-(1*S*,2*R*)-6b and *trans*-(1*R*,2*S*)-1,2-Diacetoxy-3-bromocyclohex-3-ene -6b'.**

Enantiomer **6b**, white crystals (0.92 g, 95%); mp 37-39 °C (CHCl<sub>3</sub> / hexane), [ $\alpha$ ]<sub>D</sub> +111 (*c* 1.53, CHCl<sub>3</sub>); (Found: C, 43.3; H, 4.55. C<sub>10</sub>H<sub>13</sub>O<sub>4</sub>Br requires C 43.3; H, 4.7%);  $\delta$ <sub>H</sub> (300 MHz, CDCl<sub>3</sub>) 1.78 (2 H, m, 6-H, ), 2.00 (2 H, m, 6'-H), 2.07 (3 H, s, OCOMe), 2.13 (3 H, s, OCOMe), 2.19 (2 H, m, 5-H, 5'-H), 3.85 (1 H, m, 1-H), 4.03 (1 H, d, *J*<sub>2,1</sub> 6.6, 2-H), 6.43 (1 H, d, *J*<sub>4,5</sub> 3.9, 4-H); *m/z* (EI) 279 (M+1<sup>+</sup>, 1%), 197 (2), 176 (65), 174 (66), 155 (36), 113 (24), 95 (83), 77 (22), 43 (100). Enantiomer **6b'**: [ $\alpha$ ]<sub>D</sub> -106 (*c* 1.33, CHCl<sub>3</sub>).

***trans*-(1*S*,2*R*)-6c and *trans*-(1*R*,2*S*)-1,2-Diacetoxy-3-iodocyclohex-3-ene-6c'.**

Enantiomer **6c**, white crystals (1.08 g, 95%); mp 32-34 °C (CHCl<sub>3</sub> / hexane), [ $\alpha$ ]<sub>D</sub> +145 (*c* 1.09, MeOH); (Found: C, 37.0; H, 4.0. C<sub>10</sub>H<sub>13</sub>O<sub>4</sub>I requires C 37.1; H, 4.0 %);  $\delta$ <sub>H</sub> (500 MHz, CDCl<sub>3</sub>) 1.94 (2 H, m, 6-H, 6'-H), 2.06 (3 H, s, OCOMe), 2.14 (3 H, s, OCOMe), 2.22 (2 H, m, 5-H, 5'-H), 5.02 (1 H, m, H-1), 5.47 (1 H, d, *J*<sub>2,1</sub> 4.7, 2-H), 6.14 (1 H, m, 4-H); *m/z* (EI) 323 (M-1<sup>+</sup>, 4), 264 (46), 239 (48), 222 (53), 197 (34), 155 (39), 113 (38), 95 (84), 77 (16), 43 (100). Enantiomer **6c'**: [ $\alpha$ ]<sub>D</sub> -138 (*c* 1.23, CHCl<sub>3</sub>).

***trans*-(1*S*,2*R*)-1,2-Diacetoxy-3-(trifluoromethyl)cyclohex-3-ene 6d.**

Enantiomer **6d**, yellow oil (0.87 g, 93%);  $[\alpha]_D + 105$  ( $c$  0.75,  $\text{CHCl}_3$ ); (Found:  $\text{M}^+$ - $\text{MeCO}_2$ , 207.0637  $\text{C}_9\text{H}_{10}\text{O}_2\text{F}$  requires 207.0633);  $\delta_{\text{H}}$  (500 MHz,  $\text{CDCl}_3$ ) 1.89 (1 H, m, 6-H), 2.00 (1 H, m, H-6'), 2.05 (3 H, s,  $\text{OCOMe}$ ), 2.07 (3 H, s,  $\text{OCOMe}$ ), 2.31 (2 H, m, 5-H, 5'-H), 5.06 (1 H, m, 1-H), 5.53 (1 H, d,  $J_{2,1}$  3.6, 2-H), 6.74 (1 H, m, 4-H);  $m/z$  (EI) 323 ( $\text{M}^+$ - $\text{MeCO}_2$ , 100%), 148 (27).

***trans*-(1*S*,2*R*)-7b and *trans*-(1*R*,2*S*)-1,2-Diacetoxy-3-bromo-5-bromocyclohex-3-ene 7b'.**

Enantiomers **7b** and **7b'** light yellow oil (1.16 g, 95%);  $\delta_{\text{H}}$  (500 MHz,  $\text{CDCl}_3$ ): 2.07 (3 H, s,  $\text{OCOMe}$ ), 2.13 (3 H, s,  $\text{OCOMe}$ ), 2.41 (1 H, m, 6-H), 2.52 (1 H, m, 6'-H), 4.71 (1 H, m, 5-H), 5.04 (1 H, m, 1-H), 5.60 (1 H, m, 2-H), 6.53 (1 H, m, 4-H).

***trans*-(1*S*,2*R*)-7c and *trans*-(1*R*,2*S*)-1,2-Diacetoxy-3-iodo-5-bromocyclohex-3-ene-7c'.**

Enantiomers **7c** and **7c'** light yellow oil (1.3 g, 95%);  $\delta_{\text{H}}$  (500 MHz,  $\text{CDCl}_3$ ) 2.06 (3 H, s,  $\text{OCOMe}$ ), 2.16 (3 H, s,  $\text{OCOMe}$ ), 2.43 (1 H, m, 6-H), 2.52 (1 H, m, 6'-H), 4.66 (1 H, m, 5-H), 5.34 (1 H, m, 1-H), 5.61 (1 H, m, 2-H), 6.57 (1 H, m, 4-H).

***trans*-(1*S*,2*S*)-1,2-Diacetoxy-3-(trifluoromethyl)-5-bromocyclohex-3-ene 7d.**

Light yellow oil (1.08 g, 92%);  $\delta_{\text{H}}$  (500 MHz,  $\text{CDCl}_3$ ) 2.05 (3 H, s,  $\text{OCOMe}$ ), 2.08 (3 H, s,  $\text{OCOMe}$ ), 2.51 (1 H, m, 6-H), 2.66 (1 H, m, 6'-H), 4.87 (1 H, m, 5-H), 5.09 (1 H, m, 1-H), 5.65 (1 H, m, H-2), 6.78 (1 H, m, H-4).

***trans*-(1*S*,2*R*)-8b and *trans*-(1*R*,2*S*)-1,2-Diacetoxy-3-bromocyclohexa-3,5-diene-8b'.**

Enantiomer **8b**, white crystals (0.73 g, 91%); mp 42-44 °C, ( $\text{CHCl}_3$ / hexane);  $[\alpha]_D + 363$  ( $c$  2.13,  $\text{CHCl}_3$ ); (Found: C, 43.5; H, 3.9  $\text{C}_{10}\text{H}_{11}\text{O}_4\text{Br}$  requires C 43.7; H, 4.0 %);  $\delta_{\text{H}}$  (500 MHz,  $\text{CDCl}_3$ ) 2.09 (3 H, s,  $\text{OCOMe}$ ), 2.15 (3 H, s,  $\text{OCOMe}$ ), 5.42 (1 H, dd,  $J_{1,2}$  4.4,  $J_{1,6}$  3.7, 1-H), 5.74 (1 H, d,  $J_{2,1}$  4.0, 2-H), 5.94 (1 H, m, 6-H), 6.02 (1 H, dd,  $J_{5,4}$  6.2,  $J_{5,6}$  9.5, 5-H), 6.53 (1 H, d,  $J_{4,5}$  6.2, 4-H);  $m/z$  (EI) 276 ( $\text{M}^+$ , 6%), 230 (7), 274 (6), 195 (16), 174 (55), 172 (53), 43 (100). Enantiomer **8b'**:  $[\alpha]_D - 351$  ( $c$  1.62,  $\text{CHCl}_3$ ).

***trans*-(1*S*,2*R*)-8c and *trans*-(1*R*,2*S*)-1,2-Diacetoxy-3-iodocyclohexa-3,5-diene -8c'.**

Enantiomer **8c**, white crystals (0.69 g, 74%); mp 45-46 °C, (CHCl<sub>3</sub>/ hexane); [ $\alpha$ ]<sub>D</sub> +235 (*c* 1.09, CHCl<sub>3</sub>); (Found: C, 37.2; H, 3.3 C<sub>10</sub>H<sub>11</sub>O<sub>4</sub>BI requires C 37.3; H, 3.4 %);  $\delta_{\text{H}}$  (500 MHz, CDCl<sub>3</sub>) 2.10 (3 H, s, OCOMe), 2.14 (3 H, s, OCOMe), 5.59 (1 H, m, 1-H), 5.78 (1 H, m, 2-H), 6.36(1 H, m, 6-H), 6.45 (1 H, m, 5-H), 6.56 (1 H, m, 4-H); *m/z* (EI) 322 (M<sup>+</sup>, 9%), 195 (22), 220 (68), 43 (100). Enantiomer **8c'**: [ $\alpha$ ]<sub>D</sub> -223 (*c* 1.62, CHCl<sub>3</sub>).

***trans*-(1*S*,2*R*)-1,2-Diacetoxy-3-(trifluoromethyl)-cyclohexa-3,5-diene 8d.**

Colourless oil (0.72 g, 94%); [ $\alpha$ ]<sub>D</sub> +292 (*c* 0.50, CHCl<sub>3</sub>); (Found: M<sup>+</sup>, 264.0609 C<sub>11</sub>H<sub>11</sub>O<sub>4</sub>F<sub>3</sub> requires 264.0609);  $\delta_{\text{H}}$  (500 MHz, CDCl<sub>3</sub>) 2.07 (3 H, s, OCOMe), 2.08 (3 H, s, OCOMe), 5.31 (1 H, dd, *J*<sub>1,2</sub> 4.8, *J*<sub>1,6</sub> 3.9, 1-H), 5.78 (1 H, d, *J*<sub>2,1</sub> 4.8, 2-H), 6.22(1 H, dd, *J*<sub>6,1</sub> 3.9, *J*<sub>6,5</sub> 5.2, 6-H), 6.31 (1 H, dd, *J*<sub>5,4</sub> 5.8, *J*<sub>5,6</sub> 5.2, 5-H), 6.77 (1 H, d, *J*<sub>4,5</sub> 5.8, 4-H); *m/z*(EI) 264 (M<sup>+</sup>, 1), 223 (3), 207 (3), 43 (100).

***trans*-(1*S*,2*R*)-9b and *trans*-(1*R*,2*S*)-1,2-Dihydroxy-3-bromocyclohexa-3,5-diene-9b'.**

Enantiomer **9b**, white crystals (0.50 g, 98%); mp 107-109 °C (CHCl<sub>3</sub>); [ $\alpha$ ]<sub>D</sub> +458 (*c* 0.53, MeOH); (Found: M<sup>+</sup>, 189.9627. C<sub>6</sub>H<sub>7</sub>BrO<sub>2</sub> requires 189.9629);  $\delta_{\text{H}}$  (500 MHz, CDCl<sub>3</sub>) 4.47 (1 H, d, *J*<sub>2,1</sub> 9.5, 2-H), 4.52 (1 H, ddd, *J*<sub>1,2</sub> 9.5, *J*<sub>1,5</sub> 1.7, *J*<sub>1,6</sub> 3.0, 1-H), 5.82 (2 H,m, 5-H), 5.98 (1 H, dd, *J*<sub>6,5</sub> 9.5, *J*<sub>6,1</sub> 3.0, 6-H), 6.36 (1 H, d *J*<sub>4,5</sub> 6.0, 4-H); *m/z* (EI) 190 (M<sup>+</sup>, 35%), 174(10), 172(10), 146 (32), 144(29), 111 (29), 93 (19), 81 (48), 65 (100), 55 (39). Enantiomer **9b'**: [ $\alpha$ ]<sub>D</sub> -443 (*c* 0.48, MeOH).

***trans*-(1*S*,2*R*)-9c and *trans*-(1*R*,2*S*)-1,2-Dihydroxy-3-iodocyclohexa-3,5-diene-9c'.**

Enantiomer **9c**, white crystals (0.59 g, 94%); mp 94-96 °C (CHCl<sub>3</sub>); [ $\alpha$ ]<sub>D</sub> +256 (*c* 0.85, MeOH); (Found: M<sup>+</sup>, 237.9489. C<sub>6</sub>H<sub>7</sub>O<sub>2</sub> I requires 237.9490);  $\delta_{\text{H}}$  (500 MHz, CDCl<sub>3</sub>) 4.39 (1 H, d, *J*<sub>2,1</sub> 10.7, 2-H), 4.50 (1 H, m, 1-H), 5.66 (1 H,dd, *J*<sub>5,4</sub> 6.1, *J*<sub>5,6</sub> 9.6, 5-H), 6.00 (1 H, dd, *J*<sub>6,5</sub> 9.5, *J*<sub>6,1</sub> 3.0, 6-H), 6.66 (1 H, d *J*<sub>4,5</sub> 6.1, 4-H); *m/z* (EI) 238 (M<sup>+</sup>, 59%), 220 (13), 196 (47), 192 (13), 127 (10), 111 (74), 93 (25), 83 (32), 65 (100), 55 (39). Enantiomer **9c'**: [ $\alpha$ ]<sub>D</sub> -243 (*c* 0.77, MeOH).

***trans*-(1*S*,2*S*)-1,2-Dihydroxy-3-(trifluoromethyl)cyclohexa-3,5-diene 9d.**

Colourless semi-solid (0.85 g, 93%);  $[\alpha]_D^{25} +337$  ( $c$  0.56,  $\text{CHCl}_3$ ); (Found:  $M^+$ , 182.0551.  $\text{C}_7\text{H}_9\text{F}_3\text{O}_2$  requires 182.0555);  $\delta_{\text{H}}$  (500 MHz,  $\text{CDCl}_3$ ) 4.41 (1 H, dd,  $J_{1,2}$  7.1,  $J_{1,6}$  5.9, H-1), 4.52 (1 H, d,  $J_{2,1}$  7.1, H-1), 6.11 (1 H, dd,  $J_{5,4}$  5.5,  $J_{5,6}$  3.9, H-5), 6.20 (1 H, dd,  $J_{6,1}$  5.9,  $J_{6,5}$  3.9, H-6), 6.55 (1 H, d,  $J_{4,5}$  5.5, H-4);  $m/z$  (EI) 182 ( $M^+$ , 1%), 164 ( $M-\text{H}_2\text{O}$ , 12), 30 (100).

**(1*S*,2*R*)-Di-[(*S*)-2-methoxy-2-phenyl-2-trifluoroacetoxy]-3-bromocyclohex-3-ene  
21b.**

White crystalline solid, mp 126-126 °C; (Found:  $M^+$ , 624.0587.  $\text{C}_{26}\text{H}_{23}\text{O}_6^{79}\text{BrF}_6$  requires 624.0581);  $[\alpha]_D^{25} +67$  ( $c$  0.77,  $\text{CHCl}_3$ );  $\delta_{\text{H}}$  (500 MHz,  $\text{CDCl}_3$ ) 1.68 (1 H, m, 6-H), 1.95 (1 H, m, 6'-H), 2.14 (2 H, m, 5-H, 5'-H), 3.51 (3 H, s, OMe), 3.62 (3 H, s, OMe), 5.23 (1 H, m, 1-H), 5.53 (1 H, d,  $J_{2,1}$  2.2, 2-H), 6.41 (1 H, d,  $J_{4,5}$  4.0, 4-H), 7.41-7.61 (10 H, m, Ar-H).

**(1*R*,2*S*)-Di-[(*S*)-2-methoxy-2-phenyl-2-trifluoroacetoxy]-3-bromocyclohex-3-ene  
21b'.**

White solid, mp 131-133 °C; (Found:  $M^+$ , 624.0591.  $\text{C}_{26}\text{H}_{23}\text{O}_6^{79}\text{BrF}_6$  requires 624.0581);  $[\alpha]_D^{25} -136$  ( $c$  1.45,  $\text{CHCl}_3$ );  $\delta_{\text{H}}$  (500 MHz,  $\text{CDCl}_3$ ) 2.00 (2 H, m, 5-H, 5'-H, 6-H, 6'-H), 3.54 (3 H, s, OMe), 3.57 (3 H, s, OMe), 5.35 (1 H, m, 1-H), 5.64 (1 H, d,  $J_{2,1}$  3.3, 2-H), 6.36 (1 H, m, 4-H), 7.40-7.61 (10 H, m, Ar-H).

**(1*S*,2*R*)-Di-[(*S*)-2-methoxy-2-phenyl-2-trifluoroacetoxy]-3-iodocyclohex-3-ene  
21c.**

White crystalline solid, mp 132-134 °C; (Found:  $M^+$ , 672.0428.  $\text{C}_{26}\text{H}_{23}\text{O}_6\text{IF}_6$  requires 672.0447);  $[\alpha]_D^{25} +113$  ( $c$  1.62,  $\text{CHCl}_3$ );  $\delta_{\text{H}}$  (500 MHz,  $\text{CDCl}_3$ ) 1.60 (1 H, m, 6-H), 1.94 (1 H, m, 6'-H), 2.10 (2 H, m, 5-H, 5'-H), 3.51 (3 H, s, OMe), 3.64 (3 H, s, OMe), 5.17 (1 H, m, 1-H), 5.53 (1 H, m, 2-H), 6.69 (1 H, d,  $J_{4,5}$  3.6, 4-H), 7.41-7.63 (10 H, m, Ar-H).

**(1*R*,2*S*)-Di-[(*S*)-2-Methoxy-2-phenyl-2-trifluoroacetoxy]-3-iodocyclohex-3-ene  
21c'.**

White crystalline solid, mp 125-127 °C; (Found:  $M^+$ , 672.0447.  $\text{C}_{26}\text{H}_{23}\text{O}_6\text{IF}_6$  requires 672.0443);  $[\alpha]_D^{25} -89$  ( $c$  0.95,  $\text{CHCl}_3$ );  $\delta_{\text{H}}$  (500 MHz,  $\text{CDCl}_3$ ) 1.95 (1 H, m, 6-H), 2.06

Supplementary Material for Organic & Biomolecular Chemistry  
This journal is (c) The Royal Society of Chemistry 2007

(3 H, m, 5-H, 5'-H, 6'-H), 3.55 (3 H, s, OMe), 3.59 (3 H, s, OMe), 5.30 (1 H, m, 1-H),  
5.62 (1 H, m, 2-H), 6.68 (1 H, d,  $J_{4,5}$  3.4, 4-H), 7.41-7.63 (10 H, m, Ar-H).
